# Supplementary material for: Water-based UV-ozone activation enables aggregation-free processing of MFI nanosheets for membrane fabrication
Source: Research Square preprint supplement (doi:10.21203/rs.3.rs-7510110/v1), 2025-09-29
Supplement: Supplementary file 1 [file 7c445614cf490d2d75188f6e.xlsx]

## Sheet: Sheet1
Table S4. Summary of CO2/N2 separation performance of zeolite MMMs from literature (shown in Fig. 5f) for comparison.
MMM	Thickness	Permeance of CO2	selectivity	Symbol	ref
	(μm)	(GPU)
MCM-48	/	0.1	16.43		49
Mg-MCM-41	100	10.2	23		50
MCM-41	60	0.17	32		56
CHA (SSZ-39)	100	189	43.2		37
CHA (SSZ-39)	100	83.1	59		37
CHA (SAPO-34)	70	0.41	58.6		52
CHA (SAPO-34)	70	0.11	26.3		53
CHA (SAPO-34)	70	4.49	26.1		55
CHA (SAPO-34)	2	40.95	22.3		64
CHA (SAPO-34)	1	2.2	10.5		65
Zeolite A-3 (nanocrystals)	/	1	20		48
4A	40	0.05	31.5		60
4A	30	0.01	102		62
NiY	50	0.04	39		59
NaY	50	14.8	57		59
NaY	30	0.2	27		61
Nano-size MFI	200	12	28.8		44
ZSM-5 (MFI)	150-250	0.01	6.6		45
ZSM-5(MFI)	150-250	0.01	3		45
ZSM-5 (MFI)	/	3	20.6		46
ZSM-5(MFI)	100	1.14	22.5		47
Silicalite (MFI)	100	7	25		50
MFI	90	0.1	21		51
ZSM-5(MFI)	70.6	1	20		54
Silicalite (MFI)	70	0.14	26.3		55
Pillared MFI NSs	50-80	5	1.15		57
ZSM-5(MFI)	50	0.29	47.1		58
ZSM-5 (MFI)	20	2	52.2		63
platelike MFI	5	37	16.7		14
platelike MFI	11.8	8.91	18.18		14
This work (MFI NSs)		250.23	31.94
		147.52	18.96
		145.4	20.92
		262.92	36.44
		177.19	26.3
